# Supplementary material
Source: PubMed Central journal article supplement (PMC4380624)

**Supplemental File 1: HR96 expression at different ages in *D. magna*. HR96 expression was determined in 2, 4, 7 and 14 day-old daphnids. Data are provided as mean  $\pm$  SEM (n = 5 per age group). Statistical significance was determined by ANOVA followed by Tukey's multiple comparison test with Graphpad Prism 4.0.**

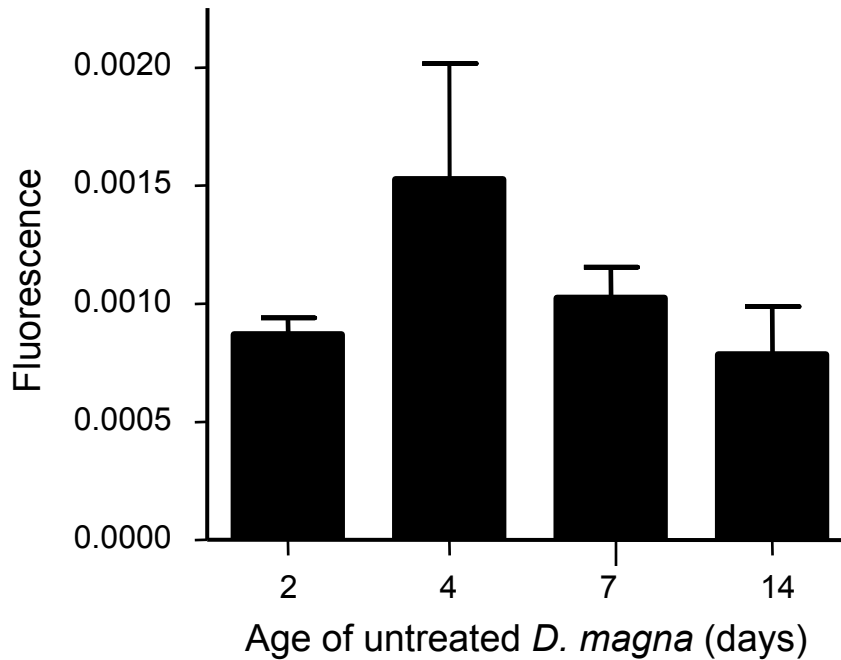

Supplement: NIHMS665900-supplement.pdf [file NIHMS665900-supplement.pdf]
